# Supplementary material
Source: PubMed Central journal article supplement (PMC3272078)
Supplement: NIHMS352334-supplement-Suppl__information.pdf [file NIHMS352334-supplement-Suppl__information.pdf]

## SUPPLEMENTARY INFORMATION ON MAQC STUDY

### Contents

| Title                                                                       | Page Number |
|-----------------------------------------------------------------------------|-------------|
| A. Goals of the MicroArray Quality Control (MAQC) Project                   | 2           |
| B. MAQC Participants and Available Data Sets                                | 3           |
| C. Quality Assessments                                                      | 7           |
| D. Platform-Specific Protocols and Data Analysis Methods                    | 8           |
| E. Probe Mapping                                                            | 14          |
| F. Number of Genes Used in Analyses                                         | 15          |
| G. Raw Data Used in Figure Representations                                  | 17          |
| H. Additional Analyses from MAQC Study                                      | 20          |
| I. Apparent Power Analysis                                                  | 21          |
| J. Reproducibility of Lists of Differentially Expressed Genes – POG Results | 24          |

MAQC web site: <http://edkb.fda.gov/MAQC/>

## A. Goals of the MicroArray Quality Control (MAQC) Project

- Establish a set of reference RNA samples for use within the MAQC project and more importantly for use by the scientific community;
- Generate a large collection of reference data sets using multiple microarray platforms across multiple laboratories per platform;
- Generate alternative measurements using other gene expression technologies for a large subset of genes;
- Measure relative accuracy as defined by titrated mixtures of the two reference RNA samples;
- Measure basic performance aspects of microarrays such as repeatability and reproducibility using a common set of genes across multiple platforms;
- Develop a framework for conducting cross-platform mapping based on probe sequence mapping to the RefSeq database and the AceView database;
- Develop quality control metrics and thresholds for objectively assessing the performance achievable by various microarray platforms;
- Compare the concordance of expression measurements to other microarray platforms and alternative technologies (*e.g.*, TaqMan<sup>®</sup>, QuantiGene<sup>®</sup>, and StaRT-PCR<sup>™</sup>) based on a pre-defined list of “common genes” that share a common reference sequence to which the probes were designed;
- Evaluate the advantages and disadvantages of various data analysis methods with the intention of reaching consensus on microarray data analysis;
- Promote the use of reference RNA samples and reference data sets by the large scientific community for quality control and performance validation in order to identify and avoid potential procedural failures;
- Make recommendations on the appropriate uses of the microarray technology.

## B. MAQC Participants and Available Data Sets

**Table S1. Platform Providers and Test Sites**

| No. | Platform           | Protocol             | Test Site           | Number of Microarrays | Organization*                        | Representative           |
|-----|--------------------|----------------------|---------------------|-----------------------|--------------------------------------|--------------------------|
| 1   | Applied Biosystems | One-Color Microarray | ABI_1               | 20                    | Applied Biosystems                   | Yongming A. Sun          |
|     |                    |                      | ABI_2               | 19                    | US Environmental Protection Agency   | David J. Dix             |
|     |                    |                      | ABI_3               | 19                    | Vanderbilt University                | Shawn Levy               |
| 2   | Affymetrix         | One-Color Microarray | AFX_1               | 20                    | Affymetrix                           | Chunmei Liu              |
|     |                    |                      | AFX_2               | 20                    | FDA/CDER                             | Karol L. Thompson        |
|     |                    |                      | AFX_3               | 20                    | Asuragen                             | Mike Wilson              |
|     |                    |                      | AFX_4 <sup>b</sup>  | 20                    | US Environmental Protection Agency   | J. Christopher Corton    |
|     |                    |                      | AFX_5 <sup>b</sup>  | 20                    | Novartis                             | Ron Peterson             |
|     |                    |                      | AFX_6 <sup>b</sup>  | 20                    | UCLA/Cedars-Sinai                    | Charles Wang             |
| 3   | Agilent            | Two-Color Microarray | AGL_1 <sup>b</sup>  | 18                    | Agilent                              | Patrick J. Collins       |
|     |                    |                      | AGL_2 <sup>b</sup>  | 18                    | FDA/NCTR                             | Tucker A. Patterson      |
|     |                    |                      | AGL_3 <sup>b</sup>  | 20                    | Cogenics/Clinical Data               | Edward K. Lobenhofer     |
|     |                    | One-Color Microarray | AG1_1               | 19                    | Agilent                              | Patrick J. Collins       |
|     |                    |                      | AG1_2               | 18                    | FDA/NCTR                             | Tucker A. Patterson      |
|     |                    |                      | AG1_3               | 19                    | Cogenics/Clinical Data               | Edward K. Lobenhofer     |
| 4   | GE Healthcare      | One-Color Microarray | GEH_1               | 20                    | GE Healthcare                        | Richard Shippy           |
|     |                    |                      | GEH_2R <sup>a</sup> | 20                    | UMass Boston                         | Michael J. Lombardi      |
|     |                    |                      | GEH_3               | 20                    | GenUs BioSystems                     | Scott R. Magnuson        |
| 5   | Illumina           | One-Color Microarray | ILM_1               | 19                    | Illumina                             | Shawn C. Baker           |
|     |                    |                      | ILM_2               | 20                    | UT Southwestern                      | Quan-Zhen Li             |
|     |                    |                      | ILM_3               | 20                    | Burnham Institute                    | Craig A. Hauser          |
| 6   | NCI_Operon         | Two-Color Microarray | NCI_1               | 20                    | NIH/NCI                              | Ernest S. Kawasaki       |
|     |                    |                      | NCI_2R <sup>a</sup> | 13                    | FDA/NCTR                             | Tao Han                  |
| 7   | Eppendorf          | One-Color Microarray | EPP_1               | 20                    | Eppendorf                            | Francoise de Longueville |
|     |                    |                      | EPP_2               | 20                    | MD Anderson                          | Lajos Pusztai            |
|     |                    |                      | EPP_3               | 20                    | Cold Spring Harbor Laboratory        | Eli Hatchwell            |
| 8   | Applied Biosystems | TaqMan® Assays       | TAQ                 | N/A                   | Applied Biosystems                   | Kathleen Y. Lee          |
| 9   | Panomics           | QuantiGene® Assays   | QGN                 | N/A                   | Panomics                             | Yuling Luo               |
| 10  | Gene Express       | StaRT-PCR™ Assays    | GEX                 | N/A                   | Gene Express/Ohio Medical University | James C. Willey          |

**TOTAL 502**

<sup>a</sup>Original MAQC data set replaced with a repeat data set in the main study.

<sup>b</sup>Data sets not included in this publication. The two-color AGL data is presented in [Patterson, T.A. *et al.*, *Nat. Biotechnol.* **24**(9), 2006]. The total number of microarrays includes 386 hybridizations that were included in this article and 116 hybridizations that were not included.

**Table S2. Data Analysis Sites**

| No. | Organization                                   | Representative     |
|-----|------------------------------------------------|--------------------|
| 1   | Biogen Idec                                    | Lisa J. Croner     |
| 2   | Expression Analysis                            | Wendell Jones      |
| 3   | FDA/NCTR                                       | Leming Shi         |
| 4   | Harvard Univ./Children's Hospital              | Zoltan Szallasi    |
| 5   | NIH/NCBI                                       | Damir Herman       |
| 6   | National Institute of Standards and Technology | Walter Liggett     |
| 7   | SAS                                            | Russ Wolfinger     |
| 8   | Stanford Univ.                                 | Hanlee Ji          |
| 9   | UIUC                                           | Sheng Zhong        |
| 10  | Univ. of Massachusetts-Boston                  | Roderick V. Jensen |
| 11  | ViaLogy                                        | Cecilie Boysen     |

**Table S3. Data Replaced or Removed from Main Study Analysis**

| Data Name    | Reason for Removal or Replacement                                                                                                                                                                                                                               | Number of Microarrays |
|--------------|-----------------------------------------------------------------------------------------------------------------------------------------------------------------------------------------------------------------------------------------------------------------|-----------------------|
| ABI_2_A5     | RT control probe LYS_1 showed 20X higher signals compared with mean of other sample A indicating unsuccessful RT reaction                                                                                                                                       | 1                     |
| ABI_3_D2     | Refrigerator failure caused microarray to be warm and dried 'swirled fluid' occurred on the microarray                                                                                                                                                          | 1                     |
| AGI_1_A1     | Determined as outlier using metrics in Agilent's Feature Extraction QC Report                                                                                                                                                                                   | 1                     |
| AGI_2_A3     | Determined as outlier using metrics in Agilent's Feature Extraction QC Report                                                                                                                                                                                   | 1                     |
| AGI_2_D2     | Determined as outlier using metrics in Agilent's Feature Extraction QC Report                                                                                                                                                                                   | 1                     |
| AGI_3_B3     | Determined as outlier using metrics in Agilent's Feature Extraction QC Report                                                                                                                                                                                   | 1                     |
| AGL_1_B5     | Determined as outlier using metrics in Agilent's Feature Extraction QC Report                                                                                                                                                                                   | 1                     |
| AGL_1_D1     | Determined as outlier using metrics in Agilent's Feature Extraction QC Report                                                                                                                                                                                   | 1                     |
| AGL_2_A1     | Determined as outlier using metrics in Agilent's Feature Extraction QC Report                                                                                                                                                                                   | 1                     |
| AGL_2_C4     | Determined as outlier using metrics in Agilent's Feature Extraction QC Report                                                                                                                                                                                   | 1                     |
| ILM_1_C3     | Low IVT yield and poor Bioanalyzer trace; Target was not hybridized                                                                                                                                                                                             | 0                     |
| ILM_2_D3     | Low IVT yield; Repeat sample named ILM_2_D6; counted n Table S1.                                                                                                                                                                                                | 1                     |
| ILM_2_D5     | Low IVT yield; Repeat sample named ILM_2_D7; counted n Table S1.                                                                                                                                                                                                | 1                     |
| NCI_2R_A3    | Indicated by the site as an outlier microarray.                                                                                                                                                                                                                 | 1                     |
| GEH_2 Set    | Data generated in August 2005 used different protocol than other GEH test sites. Replaced by GEH_2R data generated in February 2006 at same site using corrected protocol.                                                                                      | 20                    |
| NCI_2 Set    | Data generated in October 2005 had problems with the hybridization buffer. Replaced by NCI_2R data generated in November 2005 which includes 14 hybridizations: sample A = 4 hybridizations, sample B = 4 hybs, sample C = 3 hybs and sample D = 3 hybs.        | 20                    |
| NCI_3 Set    | Data generated in September-October 2005 had problems with the hybridization buffer. Replaced by NCI_3R data generated December 2005-January 2006 which includes 10 hybridizations: 4 pairs of dye-swap hybs with A and B, plus 2 self-self hybs with sample A. | 20                    |
| <b>TOTAL</b> |                                                                                                                                                                                                                                                                 | <b>71<sup>a</sup></b> |

<sup>a</sup>The total number of microarrays includes four AGL hybridizations that were not analyzed in this paper, 11 hybridizations that were replaced for quality issues and 60 hybridizations that were removed or replaced for protocol issues.

**Table S4. Other Available Data Sets**

| Platform          | Code  | Protocol             | Test Sites                             | Number of Samples | Number of Replicates | Number of Microarrays Per Test Site |
|-------------------|-------|----------------------|----------------------------------------|-------------------|----------------------|-------------------------------------|
| NCI_Operon        | NCI   | Two-Color Microarray | NCI_4: Harvard Univ.                   | 2                 | 5                    | 10                                  |
|                   |       |                      | NCI_3R: FDA/CBER                       | 2                 | 5                    | 10                                  |
| CapitalBio_Operon | BIO   | Two-Color Microarray | BIO_1: CapitalBio                      | 2                 | 10                   | 20                                  |
|                   | BIO1  | One-Color Microarray | BIO1_1: CapitalBio                     | 2                 | 5                    | 10                                  |
| Operon            | OPN   | Two-Color Microarray | OPN_1: Operon                          | 2                 | 5                    | 10                                  |
| NMC_Operon        | NMC   | Two-Color Microarray | NMC_1: Norwegian Microarray Consortium | 2                 | 5                    | 10                                  |
| TeleChem          | H25K  | Two-Color Microarray | H25K_2: Yale Univ.                     | 2                 | 15                   | 30                                  |
|                   | H25K1 | One-Color Microarray | H25K1_1: TeleChem                      | 4                 | 5                    | 10                                  |
|                   |       |                      | H25K1_2: Yale Univ.                    | 4                 | 5                    | 10                                  |
|                   |       |                      | H25K1_3: Wake Forest Univ.             | 4                 | 5                    | 10                                  |
| <b>TOTAL</b>      |       |                      |                                        |                   |                      | <b>130</b>                          |

**Table S4-A. “Tumor” Data Included in the MAQC Study<sup>a</sup>**  
(One microarray platform at two laboratories in Stanford University)

| Manufacturer | Code | Protocol             | Platform                   | Number of Probes | Number of Test Sites | Number of Samples | Number of Replicates | Total Number of Microarrays |
|--------------|------|----------------------|----------------------------|------------------|----------------------|-------------------|----------------------|-----------------------------|
| Affymetrix   | AFX  | One-Color Microarray | HG-U133 Plus 2.0 GeneChip® | 54,675           | 2                    | 2                 | 5                    | <b>20</b>                   |

<sup>a</sup>Tumor\_Stanford\_Lab1 and Tumor\_Stanford\_Lab2. T = Tumor (colon adenocarcinoma), N = Normal (normal colon tissue, patient matched). The tumor data set was analyzed in Lin, G., He, X., Ji H., Shi, L., Davis, R.W. and Zhong, S. *Nature Biotechnology*, **24**(10), 2006.

**Table S4-B. “Rat Toxicogenomics” Validation Data Included in the MAQC Study**

| Manufacturer                  | Code | Protocol             | Platform                                  | Number of Probes                           | Number of Test Sites | Number of Samples | Number of Replicates | Total Number of Microarrays |
|-------------------------------|------|----------------------|-------------------------------------------|--------------------------------------------|----------------------|-------------------|----------------------|-----------------------------|
| Applied Biosystems            | ABI  | One-Color Microarray | Rat Genome Survey Microarray              | 26,857                                     | 1                    | 6                 | 6                    | 36                          |
| Affymetrix                    | AFX  | One-Color Microarray | Rat Genome 230 2.0 GeneChip®              | 31,099                                     | 2                    | 6                 | 6                    | 72                          |
| Agilent                       | AG1  | One-Color Microarray | Whole Rat Genome Oligo Microarray, G4131A | 43,628 (41,071 – GeneSpring <sup>a</sup> ) | 1                    | 6                 | 6                    | 36                          |
| GE Healthcare                 | GEH  | One-Color Microarray | Rat Whole Genome Bioarray, 300031         | 35,129                                     | 1                    | 6                 | 6                    | 36                          |
| <b>TOTAL (Toxicogenomics)</b> |      |                      |                                           |                                            |                      |                   |                      | <b>180</b>                  |

<sup>a</sup>Data from replicating spots were averaged within GeneSpring software to generate a single value for each unique probe. The rat toxicogenomics data set was analyzed in Guo, L. *et al. Nat. Biotechnol.* **24**(9), 1162-1169(2006).

**The total number of microarrays used in the MAQC project: 1,329**

|                          |                                              |
|--------------------------|----------------------------------------------|
| 1. Official:             | 573 (502 from Table S1 and 71 from Table S3) |
| 2. Additional:           | 130 (Table S4)                               |
| 3. Tumor:                | 20 (Table S4-A)                              |
| 4. Rat Toxicogenomics:   | 180 (Table S4-B)                             |
| 5. Pilots (I* and II**): | 426                                          |

**\*MAQC Pilot-I (RNA Sample Selection): 160 microarrays (four human platforms).**

|                |    |
|----------------|----|
| AFX (2 sites): | 40 |
| AGL (2 sites): | 60 |
| GEH (2 sites): | 40 |
| ILM (1 site):  | 20 |

MAQC Pilot-I was designed to select two RNA samples for the MAQC main study. Four distinct RNA samples from three commercial vendors were tested on four microarray platforms (AFX, AGL, GEH, and ILM). Except for ILM, each platform was tested at two test sites. For each one-color platform, each RNA sample was tested in five replicates at each test site. Two RNA samples, Stratagene's Universal Human Reference RNA (UHRR) and Ambion's Human Brain Reference RNA (HBRR), designated as MAQC sample A and sample B, respectively, were selected during the second MAQC face-to-face meeting held at FDA/CDER, Rockville, Maryland on May 2-3, 2005 based on criteria including

1. Availability in large quantity from a single batch;
2. Accessibility from commercial sources;
3. High quality;
4. Wide gene presence;
5. Large fold changes for a number of genes for the sample pair;
6. Reproducibility in production.

Consensus on RNA sample selection was reached after Pilot-I data were analyzed, presented, and debated.

**\*\*MAQC Pilot-II (RNA Sample Titration): 266 microarrays (six human platforms).**

|                     |    |
|---------------------|----|
| AFX (1 site):       | 45 |
| AGL (1 site)        | 45 |
| AG1 (1 site):       | 45 |
| GEH (1 site):       | 46 |
| ILM (1 site):       | 51 |
| Anonymous (1 site): | 34 |

MAQC Pilot-II was designed to determine the appropriate mixing ratios of sample A and sample B in order to create the titration pools. A decision to include titration mixtures in the MAQC main study was made during the MAQC first face-to-face meeting at FDA/NCTR, Jefferson, Arkansas on February 11, 2005. The experimental design of Pilot-II was listed below. After reviewing the data, the MAQC consortium decided on the 75/25 and 25/75 (A/B) ratios for creating the MAQC samples C and D, respectively.

| No.                                            | Sample A (%) | Sample B (%) | Number of Replicates <sup>a</sup> |
|------------------------------------------------|--------------|--------------|-----------------------------------|
| 1                                              | 100          | 0            | 6                                 |
| 2                                              | 99.5         | 0.5          | 3                                 |
| 3                                              | 99           | 1            | 3                                 |
| 4                                              | 95           | 5            | 3                                 |
| 5                                              | 90           | 10           | 3                                 |
| 6 (C)                                          | 75           | 25           | 3                                 |
| 7                                              | 50           | 50           | 3                                 |
| 8 (D)                                          | 25           | 75           | 3                                 |
| 9                                              | 10           | 90           | 3                                 |
| 10                                             | 5            | 95           | 3                                 |
| 11                                             | 1            | 99           | 3                                 |
| 12                                             | 0.5          | 99.5         | 3                                 |
| 13                                             | 0            | 100          | 6                                 |
| Total number of arrays per site (manufacturer) |              |              | <b>45</b>                         |

<sup>a</sup>The actual number of replicates may have varied from platform to platform. TaqMan (TAQ) and QuantiGene (QGN) were also used in Pilot-II study.

*Note: Pilot-I and Pilot-II data will not be deposited in public databases until further notice.*

### C. Quality Assessments

The median length and total yields of amplified RNA (cRNA) were measured for each MAQC sample. These data are available in **Supplementary Table 1** online: MAQC cRNA Sizes and Yields. The purified cRNA size was analyzed using an RNA LabChip assay on the Agilent 2100 Bioanalyzer. The median size was determined by selecting the point (nt) which evenly divided (50%) the area in the electropherogram. Yields of the purified cRNA were determined by spectrophotometry (A260). Yields were reported as either the total amount of cRNA generated or as the normalized output per input of total RNA [cRNA(ug) / Total RNA(ng)] For example, a reaction generating 111.5 ug cRNA from 1000 ng input total RNA has a normalized output of 0.11 ug/ng.

## D. Platform-Specific Protocols and Data Analysis Methods

### **Applied Biosystems Microarrays**

Applied Biosystems Human Genome Survey Microarray is part of the Applied Biosystems Expression Array System (<http://docs.appliedbiosystems.com/pebi docs/04338853.pdf>), which includes a 1700 Chemiluminescent Microarray Analyzer, labeling and hybridization chemistries, and supporting software. Digoxigenin-UTP labeled cRNA was generated from 1 µg of total RNA for each MAQC sample (A, B, C, D) using Applied Biosystems NanoAmp™ RT-IVT Labeling Kit (P/N 4365715) according to the manufacturer's protocol. Array hybridization, array processing, chemiluminescence detection, image acquisition, and analysis were performed using Applied Biosystems Chemiluminescence Detection Kit and Applied Biosystems 1700 Chemiluminescent Microarray Analyzer following manufacturer's protocol. These protocols are detailed in the Chemiluminescent Microarray Analyzer Chemistry Guide (P/N 4338853, <http://docs.appliedbiosystems.com/pebi docs/04338853.pdf>), Chemiluminescent Detection Kit (P/N 4339627, <http://docs.appliedbiosystems.com/pebi docs/04339627.pdf>), and Chemiluminescent Microarray Analyzer User Guide (P/N 4338852B).

The Expression Array System Software suite performs the auto-gridding, feature extraction, fluorescence normalization, and signal data generation. Each probe contains a universal 24-mer control probe (ICP) co-localized. The fluorescent signal of the ICP is used in the quantification process to normalize probe chemiluminescent signal within an array. The quantification data contain many distinct measurements for each probe, including the three basic measurements: Signal, S/N, and Flag values. The Signal value is the fully corrected, background subtracted measurement of chemiluminescent signal for gene expression values. The S/N value represents the ratio of signal above noise, or the measurement uncertainty of the probe signal, and can be used as a confidence level for the probe measurement. An S/N of 3 represents approximately a 99.95% confidence that the probe is detected above the background noise. In situations where the probe showed  $S/N < 1$ , the signal measurement is replaced with a 1 SDEV upper limit based on its probe signal SDEV. The Flag value is generated for each probe from a numeric code from a series of feature quality metrics that give a descriptive quality value. Probe signals for FLAG values equal or exceeding 8192 ( $\geq 2^{13}$ ) are considered missing values and imputed in data analysis. In addition, there are varieties of control probes included on the array for quality monitoring of various microarray processes. The between array quantile normalization was performed independently for each test site after removing the control probes. Detailed image analysis algorithms and data processing can be found in document <http://docs.appliedbiosystems.com/pebi docs/04367370.pdf>. The probe sequences are available at <http://www.pantherdb.org>.

### **Affymetrix GeneChip® Microarrays**

MAQC samples were processed following Affymetrix one-cycle sample preparation protocol (Please refer to GeneChip® Expression Analysis Technical Manual for details) and hybridized to Human Genome U133 Plus 2.0 array (catalog #900470, #900466 or #900467). Affymetrix GeneChip® Operating Software (GCOS) is used to automate the control of GeneChip® Fluidics Stations and Scanners. In addition, GCOS acquires data, manages sample and experimental information, and performs gene expression data analysis. The Probe Logarithmic Intensity Error (PLIER) algorithm is used to produce a summary value for a probe set by accounting for



experimentally observed patterns for feature behavior and handling error appropriately at low and high abundance. Probe set signal intensity is transformed by adding a constant of 16 and then taking log<sub>2</sub> transformation. We use routine QC parameters to monitor the quality of the experiment, which includes visual array inspection, background, scaling factor, noise, 3'/5' GAPDH and Actin ratios, and % Present calls. Probe sequence information is publicly available at <http://www.affymetrix.com/support/technical/byproduct.affx?product=hg-u133-plus>.

### **Agilent Microarrays**

Data were generated for the MAQC project using both Agilent's One-Color Gene Expression Platform and Agilent's Two-Color Gene Expression Platform. For the one-color data sets (AG1) all four MAQC samples (A – D) were assayed, while for the two-color data sets (AGL) only samples A and B were assayed. Sample labeling, array processing and scanning, and data extraction were performed as described in either One-Color Microarray-Based Gene Expression Analysis – Protocol (AG1) or Two-Color Microarray-Based Gene Expression Analysis – Protocol (AGL). These protocols are available for download at <http://www.chem.agilent.com/scripts/generic.asp?lpage=11617&indcol=N&prodcol=Y>. The microarrays used were Agilent's Whole Human Genome Oligo Microarrays (P/N G4112A). Probe sequence information is publicly available at [http://www.chem.agilent.com/cag/bsp/bsp\\_register.asp](http://www.chem.agilent.com/cag/bsp/bsp_register.asp).

Labeled cRNAs were generated from 500 ng of total RNA for each of AG1 and AGL using Agilent's Low RNA Input Linear Amplification Kit (P/N 5188-5339). The two-color protocol was modified such that 1.5 µg of labeled cRNA was hybridized per dye channel per microarray. Agilent's Stabilization and Drying Solution was used in processing all microarrays. Microarrays were scanned using Agilent's DNA Microarray Scanner BA (P/N G2565BA) and data extracted using Agilent's Feature Extraction software, version 8.5 (P/N G2567AA). AG1 data were processed using Agilent's GeneSpring<sup>®</sup> GX software, version 7.3 (P/N G1745). Data were transformed by setting all measurements less than 5.0 to 5.0. Data points that did not have detectable signal and those that represent microarray controls were labeled as Absent, those representing either non-uniform or saturated features were labeled as Marginal, and all remaining data points were labeled as Present. All data points were median scaled using the median signal intensity value for data points labeled as Present. For AGL data points that did not have detectable signal in both dye channels and those that represent microarray controls were labeled as Absent, those representing either non-uniform or saturated features in either channel were labeled as Marginal, and all remaining data points were labeled as Present.

### **Eppendorf DualChip<sup>®</sup> Microarrays**

Each DualChip<sup>®</sup> consists of two identical microarrays on the same slide, with two separate hybridization frames. This DualChip<sup>®</sup>-concept enables two complete gene expression experiments to be run on the same slide, using a one-color labeling technique. The DualChip<sup>®</sup> array used for the MAQC consortium contains capture probes allowing the expression analysis for 294 human genes spotted in triplicate. A reverse transcription with indirect labeling was performed using 10 µg of total RNA. The internal standard mixture was used for quantification/normalization and estimation of experimental variation [de Longueville F, *et al. Biochem. Pharmacol.* **64**, 137-49, 2002; Chen & Bittner. *J. Biomedical Optics* **2**, 364-374, 1997]. The DualChip<sup>®</sup> hybridization was carried out overnight (16 hours) at 60°C according to the DualChip<sup>®</sup> instruction manual. The detection was

performed by using a Cy3-conjugated anti-biotin IgG (Jackson Immuno Research Laboratories, West Grove, PA) on biotinylated cDNA.

Using the DualChip<sup>®</sup> evaluation software, the fluorescence intensities of each DNA spot (average intensity of each pixel present within the spot) was calculated using local mean background subtraction. Very bright element intensities (saturated signals, highly expressed genes) and undetected elements were deemed unsuitable for accurate quantitative analysis. The reverse transcription and hybridization efficiency were controlled by the internal standards spiked previously in the samples. First, the values were corrected using a factor calculated from the intensity ratios of the internal standards in the reference and in the experimental samples. A second normalization was performed involving the average ratio from a set of housekeeping genes for which the expression level was effectively constant.

Within the microarray platforms participating to the MAQC project, Eppendorf platform is the only one providing low density arrays. This characteristic induces by itself major differences in the resulting data structure. Analysis procedures (normalization, ...) for high density arrays rely on assumptions that are not valid for low density arrays. Eppendorf has developed specialized data analysis scheme treating the scanning, the background correction and normalization in a suited framework for low density arrays generating array to array gene expression ratio. The data sets submitted are divided in two groups. The first data set provides gene expression ratio comparing two samples and constitutes the standard result for the Eppendorf platform. In addition, normalized intensities intra-sample have been submitted to allow the analysis of reproducibility of intensities of detected (but not saturated) genes intra-sample. Due to the difference of scanner technologies used in the different sites and to our standardized scanning procedure, the detection concordance analysis can not be evaluated from this data set. The small gene subset, the intensive use of detection and saturation flags among the 3 sets of data produced for each array through the standardized triple scanning procedure, the background correction producing negative values and scanning procedure itself render invalid the direct comparison of Eppendorf data with the other platforms. To obtain relevant comparison including all the microarray platforms, the subset of genes has been reduced to the 294 spotted on the Eppendorf DualChip<sup>®</sup>. For each individual computation, this subset of genes has been limited to the "Present" flagged genes. Furthermore, reproducibility of ratio was computed on ratio compliant with the DualChip<sup>®</sup> data analysis (B1/A1, B2/A2, B3/A3,...) for all microarray platform.

### **GE Healthcare CodeLink<sup>™</sup> Microarrays**

MAQC total RNA samples were processed following GE Healthcare's CodeLink<sup>™</sup> iExpress Expression Assay Reagent Kit protocol (Please refer to CodeLink<sup>™</sup> iExpress Expression Assay Reagent Kit Technical Manual for details at [www.codelinkbioarrays.com](http://www.codelinkbioarrays.com)) and hybridized to CodeLink<sup>™</sup> Human Whole Genome bioarrays (catalog #300026). All arrays were scanned on the GenePix 4000B scanner using manufacturer recommended settings of 600 PMT, 100% laser power, and 5 micron resolution. The resulting images were processed through the CodeLink Expression Analysis v4.1 software which automatically grids and quantifies each feature while assigning spot quality metrics. These quality metrics are applied to each spot and are displayed both numerically and as a qualitative assignment. In the MAQC study, for all microarray platforms, genes which were not detected (*i.e.*, 'absent') were excluded from subsequent analyses. The spots which are below noise on the GE Healthcare platform are flagged by the software package as "L" and

represent cases where the spot mean intensity is less than local background median plus 1.5 standard deviations of local background. Details on the CodeLink™ detection algorithms can be found at the [www.codelinkbioarrays.com](http://www.codelinkbioarrays.com) (<http://www1.amershambiosciences.com/APTRIX/upp00919.nsf/Content/WD%3AImproved+method%28275651129-B500%29?OpenDocument&hometitle=WebDocs>).

The CodeLink™ image quantification algorithms have been empirically optimized using concentration response curves [illustrated in Figure 2 of Tong, W. *et al.*, *Nat. Biotech.* **24**(9), 2006]. The lower limit of detection for the CodeLink™ platform is at least 50 fM, with 1:2,048,000 mass ratio ‘spiking’ into cRNA, with 99.2% of negative controls flagged below the detection limit. In other words, the detection algorithms for CodeLink™ has been tested down to or is approximately been optimized such that the level where signal is indistinguishable from noise which correlates to the non-specific negative control values and concentration response curves. It is recommended that these detection spot quality metrics are utilized since values below noise are unreliable and reduce correlations between platforms [Shippy, R., *et al.*, *BMC Genomics* **5**, 61, 2004]. The CodeLink™ Expression Analysis Software performs the auto-gridding, feature extraction, fluorescence normalization, signal data generation, and assigns spot quality metrics. Probe sequence information, bioarray content, and custom array formatting options can be found within the CodeLink™ iCenter at [www.gehealthcare.com/codelinkicenter](http://www.gehealthcare.com/codelinkicenter).

### **Illumina Micorarrays**

For each technical replicate, 200 ng of total RNA provided by the MAQC were amplified and labeled using the Illumina® TotalPrep™ RNA Amplification kit (Ambion; catalog #IL1791). Illumina Human-6 whole genome microarrays (Illumina; catalog # BD-25-101) were hybridized to 1.5 micrograms of labeled, amplified material, and then washed, stained, and scanned according to the protocol described in the Illumina Whole Genome Gene Expression for BeadStation Manual, Revision D. Scanning software was BeadScan 2.3.0.10. Data was processed using Illumina BeadStudio version 1.5.0.34 software using background subtraction and cubic spline normalization. Normalized hybridization intensity values were adjusted by adding a constant such that the lowest intensity value for any sample equaled 16. Individual sequences are available at [http://www.illumina.com/General/Products/ArraysReagents/zip\\_files/Human\\_WG-6\\_sequence.zip](http://www.illumina.com/General/Products/ArraysReagents/zip_files/Human_WG-6_sequence.zip)

### **NCI Operon Microarrays**

Labeling of probes, hybridization of slides and scanning was done essentially as described [Petersen, D. *et al.* *BMC Bioinformatics* **6**, 63. 2005]. Slides were scanned using an Axon 4000B instrument at 10 micron resolution. All scans were performed at 100% laser power, but the PMT setting varied from slide-to-slide depending on the labeling and hybridization outcomes. Thus, the intensity of the signals among the slides will vary, but the Cy3 and Cy5 ratios will be much less variable. Images were processed and quantified using Genepix 4.0 software (Axon Instruments, Union City, CA). The data were filtered (or flagged) on the basis of signal levels and spot quality. The raw data were submitted to MAQC and further normalized by using LOESS. Probe sequences are available at <http://omad.operon.com/download/index.php>.

### **Applied Biosystems TaqMan® Assays**

MAQC total RNA Samples A, B, C and D were reverse transcribed using random hexamers and Applied Biosystems cDNA Archive Kit to generate cDNA. There was no pretreatment of RNA

before cDNA preparation. Each TaqMan<sup>®</sup> Gene Expression Assay consists of two target specific PCR primers and a TaqMan FAM<sup>™</sup> dye-labeled MGB hybridization probe in a pre-formulated mixture that contains the three oligonucleotides. The cDNA sample and assay reagents are combined together in a single reaction well and no further handling is required. Each TaqMan<sup>®</sup> Assay was run in four replicates for each RNA sample using 10ng total cDNA (measured as total input RNA) in a 10ul final volume. Assays were run with 2X Universal Master Mix (without UNG) on Applied Biosystems 7900 Fast Real-Time PCR System using universal cycling conditions (10 min. at 95° C; 15 sec. at 95° C; 1 min. at 60° C for 40 cycles). POLAR2A was chosen as the reference gene and each replicate C<sub>T</sub> was subtracted from the average POLAR2A C<sub>T</sub> to give the log<sub>2</sub> difference ( $\Delta C_T$ ), the normalized value. The  $\Delta C_T$  of each replicate for each TaqMan<sup>®</sup> Assay was presented in the final data set as the normalized data. A raw C<sub>T</sub> value of 35 (estimated as 5 copies) was set as the limit of detection in this study. Individual replicates with a C<sub>T</sub> value >35 were considered not detected, or absent (A); replicates with C<sub>T</sub> < 35 were considered detectable and identified as expressed or present (P). For  $\Delta C_T$  calculations, we used C<sub>T</sub> of 35 for any replicate that had C<sub>T</sub> > 35. Fold changes between samples were calculated using the  $\Delta\Delta C_T$  method. Detailed information on TaqMan<sup>®</sup> Gene Expression Assays Protocol can be found at <http://docs.appliedbiosystems.com/pebi/docs/04333458.pdf>. Individual TaqMan<sup>®</sup> Gene Expression Assay information can be found at: <https://products.appliedbiosystems.com/ab/en/US/adirect/ab?JSESSIONID=Gtw2GJ2vxqyptZnQgXnvG8h41z3p4FyNb1Dy9pw5cFTNc39g1zhZ!-1961426624&cmd=ABGEKeywordSearch&catID=601267>

### **Panomics QuantiGene<sup>®</sup> Assays**

The QuantiGene<sup>®</sup> assays were performed according to the procedure of QuantiGene<sup>®</sup> Reagent System (Panomics), which was previously described in detail. Briefly, 10  $\mu$ l of starting total RNA (500 ng) from sample A, B, C or D was mixed with 40  $\mu$ l of Lysis Mixture (Panomics), 40  $\mu$ l of Capture Buffer (Panomics), and 10  $\mu$ l of target gene-specific probe set (CE, 1.65 fmol/ $\mu$ l; LE, 6.6 fmol/ $\mu$ l; BL, 3.3 fmol/ $\mu$ l). Each sample mixture was then dispensed into an individual well of a Capture Plate (Panomics). The Capture Plate was sealed with foil tape and incubated at 53°C for 16-20 h. The hybridization mixture was removed and the wells were washed 3 times with 250  $\mu$ l of Wash Buffer (0.1X SSC, 0.03% Lithium Lauryl Sulfate). Residual Wash Buffer was removed by centrifuging the inverted Capture Plate at 1000x g. Signals for the bound target mRNA were developed by sequential hybridization with branched DNA (bDNA) amplifier, and alkaline phosphatase-conjugated label probe, at 46°C for 1 hour each. Two washes with Wash Buffer were used to remove unbound material after each hybridization step. Substrate dioxetane was added to the wells and incubated at 46°C for 30 min. Luminescence from each well was measured using a Lmax microtiter plate luminometer (Molecular Devices). Three replicate assays measuring RNA directly (independent sampling  $n = 3$ ) were performed for all described experiments. Genomic DNA contamination in the RNA sample, if there is any, does not affect the QuantiGene<sup>®</sup> assay, since it remains doubled-stranded throughout the entire procedure and thus can not hybridize to the probe sets at the temperature used in the assay.

The QuantiGene<sup>®</sup> assays of 244 genes were performed for MAQC samples A, B, C, D. For all samples, background signals were determined in the absence of RNA samples and subtracted from signals obtained in the presence of RNA samples. Because QuantiGene<sup>®</sup> assay measures RNA directly, no data normalization against a reference gene is required in the data analysis. The

presence and absence call is determined by limit of detection (LOD) of the assay, where  $LOD = \text{Background} + 3SD \text{ of Background}$ . If at least two samples out of A, B, C, D has signal below LOD in a gene, we call the gene absent. To determine gene expression fold change in Sample A versus Sample B, the fold change (FC) was calculated using formula  $\log_2 FC = \log_2(S_A/S_B)$ , where  $S_A$  represents the assay signal for a target gene in sample A and  $S_B$  represents the assay signal for the target gene in sample B. A gene is considered for fold change analysis if the signal in both sample A and sample B passes the LOD.

### **Gene Express StaRT-PCR™ Assays**

Standardized RT (StaRT)-PCR™ is a quantitative competitive template PCR platform that provides numerical quantification of transcript abundance values at endpoint of PCR over the full range observed in human tissues (more than six orders of magnitude). Following reverse transcription, cDNA molecules representing each gene are measured in relation to a known number of its respective internal standard cDNA molecules. In this MAQC project StaRT-PCR™ contributed to calibration of the UHRR and HBRR samples by generating numerical transcript abundance data that are directly comparable on a numerical basis to data collected by other investigators in the future. Quantification of cDNA molecules down to as few as 10 molecules/ $10^6$  ACTB molecules through StaRT-PCR™ enabled determination of the relationship between number of molecules loaded and measurement variance due to stochastic sampling error. Inclusion of an internal standard in each measurement ensures 100% signal-to-target response in each measurement and provides a useful reference point to assess compression or expansion of signal-to-target response by other platforms. StaRT-PCR™ data are directly compared to QuantiGene® and TaqMan® data in another manuscript [Canales, R.D. *et al.*, *Nat. Biotechnol.* **24**(9), 2006].

## E. Probe Mapping

**Table S5. Summary of Probe Mapping per Gene Expression Platform**

| Platform                                                             | Length of mapped probe sequence <sup>a</sup> (nt) | Number of probe sequences analyzed <sup>b</sup> | Number of probes that met mapping criteria <sup>c</sup> (percent of all probes, %) |                      | Number of RefSeq NM Accessions mapped to probes <sup>e</sup> | Number of Entrez genes ID's mapped to probes via |                        | Number of genes, not in Entrez, mapped to probes via AceView <sup>d,f,g</sup> |
|----------------------------------------------------------------------|---------------------------------------------------|-------------------------------------------------|------------------------------------------------------------------------------------|----------------------|--------------------------------------------------------------|--------------------------------------------------|------------------------|-------------------------------------------------------------------------------|
|                                                                      |                                                   |                                                 | RefSeq                                                                             | AceView <sup>d</sup> |                                                              | RefSeq <sup>e</sup>                              | AceView <sup>d,f</sup> |                                                                               |
| ABI                                                                  | 60                                                | 32,878                                          | 18,547 (56.4)                                                                      | 25,566 (77.8)        | 21,963                                                       | 16,763                                           | 18,676                 | 3,267                                                                         |
| AFX                                                                  | 25                                                | 54,675                                          | 24,694 (45.2)                                                                      | 44,693 (81.7)        | 21,318                                                       | 15,965                                           | 18,911                 | 10,129                                                                        |
| AG1                                                                  | 60                                                | 41,000                                          | 22,677 (55.3)                                                                      | 32,024 (78.1)        | 21,890                                                       | 16,493                                           | 18,051                 | 4,055                                                                         |
| GEH                                                                  | 30                                                | 53,423                                          | 16,881 (31.6)                                                                      | 43,540 (81.5)        | 20,230                                                       | 15,429                                           | 16,984                 | 18,408                                                                        |
| ILM                                                                  | 50                                                | 47,282                                          | 20,140 (42.6)                                                                      | 31,229 (66.0)        | 22,161                                                       | 16,990                                           | 18,797                 | 8,666                                                                         |
| NCI                                                                  | 39-70                                             | 35,235                                          | 21,555 (61.2)                                                                      | 29,396 (83.4)        | 20,987                                                       | 15,899                                           | 17,641                 | 1,411                                                                         |
| EPP                                                                  | 161-513                                           | 294                                             | 285 (98.6)                                                                         | 285 (98.6)           | 315                                                          | 285                                              | 290                    | 0                                                                             |
| QGN                                                                  | 183-2,671                                         | 245                                             | 234 (95.5)                                                                         | 234 (95.5)           | 253                                                          | 233                                              | 237                    | 0                                                                             |
| GEX <sup>h</sup>                                                     | N/A                                               | 205                                             | N/A                                                                                | N/A                  | 203                                                          | 203                                              | 203                    | N/A                                                                           |
| TAQ <sup>h</sup>                                                     | N/A                                               | 1,004                                           | N/A                                                                                | N/A                  | 997                                                          | 997                                              | 997                    | N/A                                                                           |
| <i>Union of six platforms<sup>i</sup></i>                            |                                                   | 264,493                                         | 125,216 (47.3)                                                                     | 206,448 (78.1)       | 23,971                                                       | 18,114                                           | 21,662                 | 32,025                                                                        |
| <i>Intersection of six platforms<sup>i</sup></i>                     |                                                   |                                                 |                                                                                    |                      | 15,615                                                       | <b>12,091</b>                                    | 13,327                 | 9                                                                             |
| <i>Intersection of six platforms<sup>i</sup> and TAQ<sup>h</sup></i> |                                                   |                                                 |                                                                                    |                      |                                                              | <b>906</b>                                       |                        |                                                                               |

<sup>a</sup>For the AFX platform, the length of each individual probe is given. For the QGN platform, the length of the intended target is given.

<sup>b</sup>The number of probes for which mapping was attempted may slightly differ from the number of probes arrayed (**Table 1**) because of the removal of control probes and replicate spots. For the AFX platform, the number of probe sets is given.

<sup>c</sup>Probes were mapped as described in the Methods section. An exact sequence match was required and probes that match more than one gene were excluded. For the AFX platform, there are generally 11 probes per probe set, and each probe was mapped individually. An exact match of 80% of the probes in a probe set was required for the probe set to qualify as a perfect match. All the mapping data supporting this table are available from supplementary materials online and the MAQC web site (<http://edkb.fda.gov/MAQC/>).

<sup>d</sup>AceView is a transcriptome database that combines RefSeq, GenBank and dbEST entries [Thierry-Mieg, D & Thierry-Mieg, J, *Genome Biology* **7** (Suppl 1):S12, 2006]. For the details on the AceView mapping, please refer to the supplementary materials online at <ftp://ftp.ncbi.nlm.nih.gov/repository/acedb/MAQC/MaqcMapping2AceViewTranscripts.zip>.

<sup>e</sup>The numbers in these columns illustrate the source of the common set of 12,091 genes represented on the six high-density microarray platforms which have an overlap of 906 genes with the TAQ platform. The data do not fully reflect the coverage of each platform because the degree to which RefSeq and non-RefSeq sequences are emphasized during probe design and selection differs among the platforms.

<sup>f</sup>The number of Entrez genes specifically assayed, through any of their alternative transcript variants, is given in these columns. Probes with a few gaps or mismatches were permitted, but at the same time, probes with even a minor risk of cross-hybridization to another gene (with up to 30% mismatches) were ignored.

<sup>g</sup>Genes, not yet in Entrez, are supported by cDNAs in GenBank, and are described in AceView. The sum of genes in Entrez (via AceView) and genes not in Entrez that mapped to probes (via AceView) is the total number of genes in the AceView database that are matched by each platform under the mapping criteria chosen for this study.

<sup>h</sup>For the two PCR-based platforms (GEX and TAQ), no exact sequence mapping was conducted. Consequently, assay annotation information provided by the manufacturers was used to determine cross-platform mapping.

<sup>i</sup>The union and intersection numbers are based on the six high-density microarray platforms (ABI, AFX, AG1, GEH, ILM, and NCI).

## F. Number of Genes Used in Analyses

**Table S6. Number of Genes Used in Within-Platform Analyses**

| Microarray Platform    | MAQC Sample | Subset of Generally Detected Genes<br>( <i>i.e.</i> , Detected $\geq 3$ Replicates) |                     |                     |                        | Subset of Perfectly Detected Genes<br>( <i>i.e.</i> , Detected in All Replicates) <sup>c</sup> |        |        |           |
|------------------------|-------------|-------------------------------------------------------------------------------------|---------------------|---------------------|------------------------|------------------------------------------------------------------------------------------------|--------|--------|-----------|
|                        |             | Site 1 <sup>a</sup>                                                                 | Site 2 <sup>a</sup> | Site 3 <sup>a</sup> | All Sites <sup>b</sup> | Site 1                                                                                         | Site 2 | Site 3 | All Sites |
| Applied Biosystems     | A           | 8984                                                                                | 8944                | 9703                | 8615                   | 8097                                                                                           | 8300   | 8875   | 7732      |
|                        | B           | 9055                                                                                | 8932                | 9645                | 8632                   | 8249                                                                                           | 7828   | 8556   | 7484      |
|                        | C           | 9549                                                                                | 9357                | 9777                | 9081                   | 8749                                                                                           | 8301   | 8846   | 7999      |
|                        | D           | 9510                                                                                | 9300                | 9585                | 8980                   | 8696                                                                                           | 8195   | 8978   | 7926      |
| Affymetrix             | A           | 8565                                                                                | 8270                | 8542                | 8016                   | 7966                                                                                           | 7671   | 8028   | 7389      |
|                        | B           | 8391                                                                                | 8023                | 8394                | 7777                   | 7757                                                                                           | 7328   | 7780   | 7052      |
|                        | C           | 8883                                                                                | 8608                | 8944                | 8407                   | 8289                                                                                           | 7918   | 8402   | 7725      |
|                        | D           | 8919                                                                                | 8529                | 8785                | 8333                   | 8259                                                                                           | 7901   | 8112   | 7643      |
| Agilent (one color)    | A           | 9318                                                                                | 9375                | 9940                | 9164                   | 9060                                                                                           | 9118   | 9540   | 8810      |
|                        | B           | 9153                                                                                | 9280                | 9827                | 8972                   | 8673                                                                                           | 8861   | 9543   | 8504      |
|                        | C           | 9664                                                                                | 9815                | 10324               | 9561                   | 9329                                                                                           | 9429   | 9849   | 9067      |
|                        | D           | 9676                                                                                | 9819                | 10322               | 9544                   | 9141                                                                                           | 9553   | 9894   | 8980      |
| GE Healthcare          | A           | 10869                                                                               | 10982               | 10827               | 10619                  | 10036                                                                                          | 10462  | 10370  | 9475      |
|                        | B           | 10897                                                                               | 10927               | 10759               | 10593                  | 10293                                                                                          | 10433  | 10281  | 9652      |
|                        | C           | 11085                                                                               | 11171               | 11031               | 10847                  | 10559                                                                                          | 10576  | 10537  | 9811      |
|                        | D           | 11130                                                                               | 11149               | 11055               | 10861                  | 10508                                                                                          | 10310  | 10664  | 9605      |
| Illumina               | A           | 8872                                                                                | 8709                | 8505                | 8361                   | 8568                                                                                           | 8241   | 8062   | 7952      |
|                        | B           | 8966                                                                                | 8779                | 8522                | 8407                   | 8628                                                                                           | 8301   | 8085   | 7961      |
|                        | C           | 9137                                                                                | 8936                | 8832                | 8683                   | 8939                                                                                           | 8520   | 8421   | 8277      |
|                        | D           | 9339                                                                                | 9069                | 8854                | 8756                   | 9013                                                                                           | 8591   | 8479   | 8353      |
| NCI_Operon             | A           | 12029                                                                               | 11527               |                     |                        | 11987                                                                                          | 11852  |        |           |
|                        | B           | 12030                                                                               | 11671               | N/A                 | N/A                    | 11958                                                                                          | 11782  | N/A    | N/A       |
|                        | C           | 12024                                                                               | 11522               |                     |                        | 11992                                                                                          | 11846  |        |           |
|                        | D           | 12050                                                                               | 11648               |                     |                        | 11995                                                                                          | 11939  |        |           |
| Eppendorf <sup>d</sup> | A           | 160                                                                                 | 171                 | 174                 | 157                    |                                                                                                |        |        |           |
|                        | B           | 93                                                                                  | 119                 | 159                 | 90                     | N/A                                                                                            | N/A    | N/A    | N/A       |
|                        | C           | 131                                                                                 | 170                 | 181                 | 130                    |                                                                                                |        |        |           |
|                        | D           | 128                                                                                 | 151                 | 205                 | 128                    |                                                                                                |        |        |           |

<sup>a</sup>Numbers used in intra-site repeatability analysis, including replicate CV distribution (**Figure 1**) and the average of the three replicate CV medians (**Figure 2**).

<sup>b</sup>Numbers used in inter-site reproducibility analysis, including total CV median (**Figure 2**).

<sup>c</sup>Numbers used in concordant detection calls (**Figure 3**).

<sup>d</sup>Eppendorf platform is an open system. Different scanner technologies and settings have been used by the different test sites.

**Table S7. Size of Differentially Expressed Gene Lists**

| Platform            | Test Site | Gene List Size <sup>a</sup> |
|---------------------|-----------|-----------------------------|
| Applied Biosystems  | ABI_1     | 4704                        |
|                     | ABI_2     | 4206                        |
|                     | ABI_3     | 4648                        |
| Affymetrix          | AFX_1     | 4441                        |
|                     | AFX_2     | 4232                        |
|                     | AFX_3     | 4541                        |
| Agilent (one color) | AG1_1     | 5383                        |
|                     | AG1_2     | 5458                        |
|                     | AG1_3     | 5249                        |
| GE Healthcare       | GEH_1     | 4228                        |
|                     | GEH_2     | 4685                        |
|                     | GEH_3     | 4763                        |
| Illumina            | ILM_1     | 4153                        |
|                     | ILM_2     | 4248                        |
|                     | ILM_3     | 3763                        |
| NCI_Operon          | NCI_1     | 3158                        |
|                     | NCI_2     | 2097                        |

<sup>a</sup>Number of genes from the 12,091 common set with fold change > 2 and P value < 0.001, which are used in analysis of Gene List Agreement (**Figure 4**).

**Table S8. Number of Genes in Log Ratio Studies**

| Test Site | ABI_1 | ABI_2 | ABI_3 | AFX_1 | AFX_2 | AFX_3 | AG1_1 | AG1_2 | AG1_3 | EPP_1 | EPP_2 | EPP_3 | GEH_1 | GEH_2 | GEH_3 | ILM_1 | ILM_2 | ILM_3 | NCI_1 | NCI_2 | GEX_1 | QGN_1 | TAQ_1 |
|-----------|-------|-------|-------|-------|-------|-------|-------|-------|-------|-------|-------|-------|-------|-------|-------|-------|-------|-------|-------|-------|-------|-------|-------|
| ABI_1     |       | 7679  | 7999  | 6544  | 6182  | 6481  | 7046  | 7171  | 7417  | 110   | 123   | 151   | 7677  | 7719  | 7646  | 6912  | 6797  | 6648  | 8051  | 7901  | 118   | 116   | 528   |
| ABI_2     | 7679  |       | 7931  | 6570  | 6205  | 6503  | 7017  | 7133  | 7370  | 112   | 124   | 152   | 7576  | 7614  | 7545  | 6883  | 6778  | 6628  | 7935  | 7799  | 120   | 117   | 523   |
| ABI_3     | 7999  | 7931  |       | 6920  | 6535  | 6858  | 7493  | 7623  | 7937  | 116   | 129   | 157   | 8293  | 8344  | 8251  | 7320  | 7186  | 7013  | 8786  | 8599  | 125   | 125   | 567   |
| AFX_1     | 6544  | 6570  | 6920  |       | 6821  | 7137  | 6786  | 6910  | 7064  | 107   | 116   | 138   | 7182  | 7198  | 7153  | 6841  | 6734  | 6584  | 7388  | 7295  | 119   | 103   | 469   |
| AFX_2     | 6182  | 6205  | 6535  | 6821  |       | 6972  | 6385  | 6500  | 6662  | 103   | 112   | 133   | 6814  | 6821  | 6774  | 6441  | 6345  | 6196  | 7034  | 6943  | 107   | 100   | 451   |
| AFX_3     | 6481  | 6503  | 6858  | 7137  | 6972  |       | 6706  | 6835  | 7015  | 107   | 117   | 139   | 7175  | 7189  | 7142  | 6771  | 6658  | 6502  | 7418  | 7315  | 115   | 104   | 472   |
| AG1_1     | 7046  | 7017  | 7493  | 6786  | 6385  | 6706  |       | 8178  | 8335  | 120   | 130   | 159   | 7941  | 7994  | 7907  | 7202  | 7078  | 6944  | 8300  | 8170  | 122   | 116   | 532   |
| AG1_2     | 7171  | 7133  | 7623  | 6910  | 6500  | 6835  | 8178  |       | 8419  | 117   | 127   | 157   | 8079  | 8133  | 8056  | 7325  | 7193  | 7034  | 8433  | 8301  | 124   | 114   | 547   |
| AG1_3     | 7417  | 7370  | 7937  | 7064  | 6662  | 7015  | 8335  | 8419  |       | 122   | 134   | 167   | 8581  | 8649  | 8552  | 7518  | 7372  | 7192  | 9089  | 8911  | 131   | 121   | 595   |
| EPP_1     | 110   | 112   | 116   | 107   | 103   | 107   | 120   | 117   | 122   |       | 122   | 127   | 119   | 120   | 118   | 113   | 112   | 111   | 125   | 125   | 25    | 36    | 53    |
| EPP_2     | 123   | 124   | 129   | 116   | 112   | 117   | 130   | 127   | 134   | 122   |       | 146   | 135   | 138   | 135   | 123   | 122   | 119   | 144   | 143   | 28    | 44    | 64    |
| EPP_3     | 151   | 152   | 157   | 138   | 133   | 139   | 159   | 157   | 167   | 127   | 146   |       | 168   | 173   | 167   | 148   | 146   | 143   | 188   | 185   | 31    | 54    | 84    |
| GEH_1     | 7677  | 7576  | 8293  | 7182  | 6814  | 7175  | 7941  | 8079  | 8581  | 119   | 135   | 168   |       | 10262 | 10210 | 7684  | 7512  | 7299  | 10389 | 10012 | 147   | 147   | 670   |
| GEH_2     | 7719  | 7614  | 8344  | 7198  | 6821  | 7189  | 7994  | 8133  | 8649  | 120   | 138   | 173   | 10262 |       | 10175 | 7727  | 7550  | 7337  | 10480 | 10091 | 146   | 151   | 680   |
| GEH_3     | 7646  | 7545  | 8251  | 7153  | 6774  | 7142  | 7907  | 8056  | 8552  | 118   | 135   | 167   | 10210 | 10175 |       | 7671  | 7493  | 7286  | 10256 | 9898  | 148   | 145   | 660   |
| ILM_1     | 6912  | 6883  | 7320  | 6841  | 6441  | 6771  | 7202  | 7325  | 7518  | 113   | 123   | 148   | 7684  | 7727  | 7671  |       | 7764  | 7533  | 7985  | 7864  | 120   | 110   | 516   |
| ILM_2     | 6797  | 6778  | 7186  | 6734  | 6345  | 6658  | 7078  | 7193  | 7372  | 112   | 122   | 146   | 7512  | 7550  | 7493  | 7764  |       | 7490  | 7793  | 7674  | 120   | 109   | 505   |
| ILM_3     | 6648  | 6628  | 7013  | 6584  | 6196  | 6502  | 6944  | 7034  | 7192  | 111   | 119   | 143   | 7299  | 7337  | 7286  | 7533  | 7490  |       | 7566  | 7463  | 117   | 103   | 484   |
| NCI_1     | 8051  | 7935  | 8786  | 7388  | 7034  | 7418  | 8300  | 8433  | 9089  | 125   | 144   | 188   | 10389 | 10480 | 10256 | 7985  | 7793  | 7566  |       | 11416 | 152   | 177   | 769   |
| NCI_2     | 7901  | 7799  | 8599  | 7295  | 6943  | 7315  | 8170  | 8301  | 8911  | 125   | 143   | 185   | 10012 | 10091 | 9898  | 7864  | 7674  | 7463  | 11416 |       | 147   | 170   | 740   |
| GEX_1     | 118   | 120   | 125   | 119   | 107   | 115   | 122   | 124   | 131   | 25    | 28    | 31    | 147   | 146   | 148   | 120   | 120   | 117   | 152   | 147   |       | 39    | 82    |
| QGN_1     | 116   | 117   | 125   | 103   | 100   | 104   | 116   | 114   | 121   | 36    | 44    | 54    | 147   | 151   | 145   | 110   | 109   | 103   | 177   | 170   | 39    |       | 157   |
| TAQ_1     | 528   | 523   | 567   | 469   | 451   | 472   | 532   | 547   | 595   | 53    | 64    | 84    | 670   | 680   | 660   | 516   | 505   | 484   | 769   | 740   | 82    | 157   |       |

<sup>a</sup>Numbers used in Compression/Expansion (**Figure 5A**) and Rank Correlation (**Figure 5B**) analyses.



### G. Raw Data Used in Figure Representations

**Table S9. Gene List Agreement Data**

| Test Site | Test Site X |       |       |       |       |       |       |       |       |       |       |       | Test Site Y |       |       |       |
|-----------|-------------|-------|-------|-------|-------|-------|-------|-------|-------|-------|-------|-------|-------------|-------|-------|-------|
|           | ABI_1       | ABI_2 | ABI_3 | AFX_1 | AFX_2 | AFX_3 | AG1_1 | AG1_2 | AG1_3 | GEH_1 | GEH_2 | GEH_3 |             | ILM_1 | ILM_2 | ILM_3 |
| ABI_1     | 82.9        | 87.8  | 70.5  | 67.5  | 70.7  | 77.7  | 79.6  | 78.9  | 63.1  | 66.4  | 66.6  | 67.5  | 69.5        | 63.6  | 47.6  | 32.8  |
| ABI_2     | 92.7        | 92.2  | 74.3  | 71.7  | 74.2  | 80.0  | 82.2  | 82.2  | 65.4  | 68.4  | 68.7  | 71.0  | 72.8        | 67.1  | 51.0  | 35.4  |
| ABI_3     | 88.9        | 83.4  | 73.1  | 70.2  | 73.4  | 79.1  | 81.4  | 80.8  | 64.8  | 67.9  | 68.6  | 69.8  | 71.1        | 65.1  | 49.6  | 33.6  |
| AFX_1     | 74.6        | 70.3  | 76.5  | 91.1  | 95.8  | 89.1  | 89.7  | 87.4  | 72.2  | 75.9  | 76.0  | 79.4  | 79.8        | 74.2  | 56.8  | 38.4  |
| AFX_2     | 75.0        | 71.2  | 77.2  | 95.6  | 98.5  | 89.4  | 89.3  | 87.3  | 73.3  | 76.9  | 77.0  | 79.4  | 79.5        | 74.3  | 58.4  | 39.7  |
| AFX_3     | 73.2        | 68.7  | 75.1  | 93.7  | 91.8  | 88.4  | 88.3  | 85.6  | 71.6  | 75.6  | 75.8  | 77.3  | 77.6        | 71.9  | 56.2  | 37.9  |
| AG1_1     | 67.9        | 62.5  | 68.3  | 73.5  | 70.3  | 74.5  | 91.4  | 87.5  | 64.3  | 69.1  | 69.3  | 67.4  | 68.6        | 62.9  | 47.8  | 32.9  |
| AG1_2     | 68.6        | 63.3  | 69.3  | 73.0  | 69.3  | 73.5  | 90.1  | 88.4  | 64.0  | 68.0  | 68.8  | 68.5  | 69.8        | 63.7  | 47.2  | 32.0  |
| AG1_3     | 70.7        | 65.8  | 71.5  | 73.9  | 70.4  | 74.1  | 89.7  | 91.9  | 64.1  | 67.5  | 68.1  | 70.1  | 71.5        | 65.1  | 48.3  | 33.0  |
| GEH_1     | 70.2        | 65.1  | 71.3  | 75.9  | 73.4  | 76.9  | 81.9  | 82.6  | 91.8  | 95.5  | 95.5  | 70.6  | 71.3        | 65.3  | 51.3  | 35.8  |
| GEH_2     | 66.7        | 61.4  | 67.4  | 71.9  | 69.5  | 73.2  | 79.3  | 79.2  | 82.8  | 89.8  | 89.8  | 65.8  | 66.5        | 61.0  | 48.6  | 33.6  |
| GEH_3     | 65.8        | 60.7  | 67.0  | 70.9  | 68.4  | 72.2  | 78.3  | 78.8  | 84.8  | 88.3  | 88.3  | 65.3  | 65.9        | 60.2  | 47.6  | 32.9  |
| ILM_1     | 76.5        | 71.9  | 78.1  | 84.9  | 80.9  | 84.5  | 87.4  | 90.1  | 71.9  | 74.3  | 74.8  | 95.4  | 87.4        | 55.9  | 38.3  |       |
| ILM_2     | 77.0        | 72.0  | 77.8  | 83.5  | 79.2  | 82.9  | 86.9  | 89.7  | 71.0  | 73.4  | 73.9  | 93.3  | 86.1        | 54.4  | 37.5  |       |
| ILM_3     | 79.5        | 75.0  | 80.4  | 87.6  | 83.6  | 86.8  | 90.0  | 92.4  | 73.4  | 76.0  | 76.2  | 96.4  | 97.2        | 57.8  | 40.4  |       |
| NCI_1     | 70.9        | 68.0  | 73.1  | 79.9  | 78.3  | 80.7  | 81.4  | 81.5  | 68.7  | 72.2  | 71.7  | 73.6  | 73.2        | 68.9  | 51.3  |       |
| NCI_2     | 73.5        | 71.0  | 74.5  | 81.4  | 80.2  | 82.1  | 84.4  | 83.3  | 72.2  | 75.0  | 74.8  | 75.9  | 75.9        | 72.6  | 77.3  |       |

Data presented in **Figure 4**. Gene list agreement is defined as the percent overlap of genes on the list for Test Site Y that are also present on the list for Test Site X. The size of the list of differentially expressed genes for each test site is reported in **Table S7**.

**Table S10. Compression/Expansion of Log Ratio**

| Test Site | Test Site X |       |       |       |       |       |       |       |       |       |       |       |       |       |       | TAQ   |       |       |       |       |       |       |       |
|-----------|-------------|-------|-------|-------|-------|-------|-------|-------|-------|-------|-------|-------|-------|-------|-------|-------|-------|-------|-------|-------|-------|-------|-------|
|           | ABI_1       | ABI_2 | ABI_3 | AFX_1 | AFX_2 | AFX_3 | AGI_1 | AGI_2 | AGI_3 | EPP_1 | EPP_2 | EPP_3 | GEH_1 | GEH_2 | GEH_3 |       | ILM_1 | ILM_2 | ILM_3 | NCI_1 | NCI_2 | GEX_1 | QGN_1 |
| ABI_1     | .010        | .022  | .010  | -.113 | -.144 | -.114 | .064  | .090  | .049  | -.158 | -.182 | -.216 | -.244 | -.203 | -.184 | -.145 | -.124 | -.163 | -.439 | -.278 | .306  | .142  | .304  |
| ABI_2     | .010        |       | -.010 | -.107 | -.138 | -.105 | .078  | .101  | .065  | -.202 | -.211 | -.241 | -.223 | -.181 | -.162 | -.135 | -.115 | -.152 | -.419 | -.247 | .304  | .145  | .321  |
| ABI_3     | .022        | .010  |       | -.102 | -.133 | -.101 | .095  | .122  | .081  | -.136 | -.152 | -.166 | -.219 | -.176 | -.155 | -.133 | -.112 | -.153 | -.425 | -.262 | .316  | .119  | .328  |
| AFX_1     | .127        | .120  | .114  |       | -.024 | .006  | .168  | .187  | .161  | -.033 | -.112 | -.085 | -.129 | -.098 | -.075 | -.041 | -.020 | -.065 | -.292 | -.108 | .364  | .149  | .282  |
| AFX_2     | .168        | .159  | .154  | .025  |       | .034  | .209  | .228  | .204  | -.032 | -.119 | -.087 | -.095 | -.063 | -.038 | -.014 | .008  | -.034 | -.257 | -.070 | .261  | .180  | .331  |
| AFX_3     | .129        | .118  | .112  | -.006 | -.033 |       | .171  | .191  | .170  | -.057 | -.135 | -.117 | -.135 | -.103 | -.078 | -.048 | -.025 | -.070 | -.300 | -.127 | .240  | .128  | .251  |
| AGI_1     | -.060       | -.072 | -.086 | -.144 | -.173 | -.146 |       | .021  | -.031 | -.177 | -.226 | -.311 | -.287 | -.246 | -.227 | -.179 | -.159 | -.196 | -.477 | -.328 | .098  | -.054 | .140  |
| AGI_2     | -.083       | -.092 | -.109 | -.157 | -.186 | -.161 | -.021 |       | -.046 | -.187 | -.228 | -.330 | -.313 | -.274 | -.256 | -.197 | -.178 | -.213 | -.496 | -.356 | .076  | -.146 | .069  |
| AGI_3     | -.046       | -.061 | -.075 | -.139 | -.169 | -.146 | .032  | .048  |       | -.224 | -.272 | -.308 | -.285 | -.243 | -.223 | -.172 | -.151 | -.188 | -.479 | -.337 | .126  | -.037 | .182  |
| EPP_1     | .188        | .253  | .157  | .035  | .033  | .061  | .215  | .229  | .289  |       | .008  | .012  | -.026 | .007  | .007  | .016  | .038  | -.013 | -.221 | .016  | .525  | .139  | .562  |
| EPP_2     | .223        | .267  | .179  | .127  | .135  | .156  | .292  | .295  | .374  | -.008 |       | .024  | -.019 | .035  | .046  | .111  | .137  | .071  | -.217 | .060  | .542  | .378  | .891  |
| EPP_3     | .275        | .318  | .199  | .093  | .096  | .133  | .451  | .492  | .445  | -.012 | -.024 |       | .041  | .092  | .107  | .088  | .102  | .042  | -.266 | -.013 | .525  | .283  | .911  |
| GEH_1     | .323        | .288  | .280  | .148  | .105  | .156  | .403  | .456  | .399  | .027  | .019  | -.040 |       | .038  | .075  | .111  | .140  | .080  | -.265 | -.072 | 1.044 | .365  | .774  |
| GEH_2     | .255        | .221  | .213  | .108  | .067  | .115  | .326  | .377  | .320  | -.007 | -.034 | -.084 | -.037 |       | .037  | .063  | .091  | .035  | -.304 | -.125 | .973  | .284  | .665  |
| GEH_3     | .225        | .193  | .184  | .081  | .040  | .085  | .294  | .343  | .287  | -.007 | -.044 | -.097 | -.070 | -.036 |       | .036  | .063  | .006  | -.337 | -.161 | .855  | .243  | .631  |
| ILM_1     | .169        | .156  | .154  | .043  | .014  | .050  | .219  | .245  | .208  | -.016 | -.100 | -.081 | -.100 | -.059 | -.034 |       | .019  | -.032 | -.305 | -.120 | .455  | .259  | .401  |
| ILM_2     | .141        | .131  | .127  | .020  | -.008 | .026  | .189  | .217  | .178  | -.036 | -.120 | -.093 | -.122 | -.083 | -.059 | -.019 |       | -.048 | -.317 | -.133 | .351  | .215  | .382  |
| ILM_3     | .195        | .179  | .180  | .069  | .035  | .075  | .244  | .271  | .232  | .013  | -.066 | -.041 | -.074 | -.034 | -.006 | .033  | .050  |       | -.280 | -.082 | .403  | .268  | .448  |
| NCI_1     | .784        | .721  | .739  | .412  | .346  | .428  | .912  | .985  | .921  | .284  | .277  | .363  | .361  | .437  | .509  | .438  | .464  | .389  |       | .217  | 1.481 | 1.386 | 1.672 |
| NCI_2     | .385        | .327  | .355  | .121  | .076  | .145  | .488  | .553  | .507  | -.016 | -.057 | .013  | .078  | .142  | .191  | .137  | .153  | .089  | -.178 |       | .915  | .780  | 1.213 |
| GEX_1     | -.234       | -.233 | -.240 | -.267 | -.207 | -.193 | -.089 | -.070 | -.112 | -.344 | -.351 | -.344 | -.511 | -.493 | -.461 | -.313 | -.260 | -.287 | -.597 | -.478 |       | -.284 | -.012 |
| QGN_1     | -.124       | -.127 | -.107 | -.129 | -.153 | -.113 | .057  | .171  | .038  | -.122 | -.274 | -.220 | -.267 | -.221 | -.195 | -.206 | -.177 | -.211 | -.581 | -.438 | .397  |       | .286  |
| TAQ_1     | -.233       | -.243 | -.247 | -.220 | -.249 | -.201 | -.123 | -.065 | -.154 | -.360 | -.471 | -.477 | -.436 | -.399 | -.387 | -.286 | -.277 | -.310 | -.626 | -.548 | .012  | -.222 |       |

Data represented in Figure 5A. Compression/expansion is defined as the percent difference from equivalency between platform/sites (corresponding to a slope value 1 for the best fitted line using orthogonal regression) of the log ratio differential expression using A and B replicates.

**Table S11. Rank Correlation of Log Ratio**

| Test Site | Test Site X |       |       |       |       |       |       |       |       |       |       |       |       |       |       |       |       |       |       |       |       |       |
|-----------|-------------|-------|-------|-------|-------|-------|-------|-------|-------|-------|-------|-------|-------|-------|-------|-------|-------|-------|-------|-------|-------|-------|
|           | ABI_1       | ABI_2 | ABI_3 | AFX_1 | AFX_2 | AFX_3 | AGI_1 | AGI_2 | AGI_3 | EPP_1 | EPP_2 | EPP_3 | GEH_1 | GEH_2 | GEH_3 | ILM_1 | ILM_2 | ILM_3 | NCI_1 | NCI_2 | GEX_1 | QGN_1 |
| ABI_1     | .985        | .982  | .871  | .868  | .870  | .875  | .877  | .872  | .848  | .834  | .835  | .824  | .834  | .815  | .870  | .873  | .867  | .742  | .725  | .757  | .836  | .847  |
| ABI_2     | .985        | .984  | .875  | .873  | .875  | .873  | .874  | .871  | .850  | .845  | .839  | .829  | .835  | .819  | .874  | .877  | .870  | .745  | .725  | .742  | .860  | .843  |
| ABI_3     | .982        | .984  | .882  | .881  | .882  | .878  | .880  | .874  | .864  | .853  | .842  | .825  | .833  | .817  | .881  | .882  | .873  | .741  | .722  | .739  | .842  | .842  |
| AFX_1     | .871        | .875  | .882  | .994  | .996  | .936  | .936  | .933  | .855  | .846  | .847  | .872  | .872  | .856  | .941  | .941  | .936  | .831  | .808  | .814  | .864  | .905  |
| AFX_2     | .868        | .873  | .881  | .994  | .997  | .931  | .931  | .929  | .834  | .818  | .830  | .870  | .871  | .854  | .935  | .935  | .929  | .833  | .808  | .796  | .845  | .903  |
| AFX_3     | .870        | .875  | .882  | .996  | .997  | .935  | .935  | .932  | .861  | .853  | .855  | .871  | .871  | .857  | .939  | .938  | .932  | .832  | .808  | .812  | .869  | .907  |
| AGI_1     | .875        | .873  | .878  | .936  | .931  | .935  | .986  | .979  | .901  | .869  | .867  | .859  | .864  | .851  | .930  | .930  | .927  | .781  | .765  | .842  | .876  | .887  |
| AGI_2     | .877        | .874  | .880  | .936  | .931  | .935  | .986  | .980  | .903  | .861  | .872  | .861  | .865  | .853  | .932  | .931  | .927  | .779  | .763  | .852  | .863  | .902  |
| AGI_3     | .872        | .871  | .874  | .933  | .929  | .932  | .979  | .980  | .911  | .878  | .870  | .845  | .849  | .834  | .926  | .926  | .922  | .772  | .757  | .831  | .858  | .892  |
| EPP_1     | .848        | .850  | .864  | .855  | .834  | .861  | .901  | .903  | .911  | .954  | .964  | .821  | .817  | .826  | .911  | .906  | .903  | .815  | .796  | .785  | .904  | .908  |
| EPP_2     | .834        | .845  | .853  | .846  | .818  | .853  | .869  | .861  | .878  | .954  | .980  | .779  | .772  | .789  | .904  | .903  | .893  | .762  | .729  | .698  | .803  | .798  |
| EPP_3     | .835        | .839  | .842  | .847  | .830  | .855  | .867  | .872  | .870  | .964  | .980  | .790  | .796  | .812  | .894  | .895  | .882  | .748  | .720  | .590  | .834  | .839  |
| GEH_1     | .824        | .829  | .825  | .872  | .870  | .871  | .859  | .861  | .845  | .821  | .779  | .790  | .968  | .980  | .863  | .861  | .862  | .723  | .709  | .731  | .805  | .840  |
| GEH_2     | .834        | .835  | .833  | .872  | .871  | .871  | .864  | .865  | .849  | .817  | .772  | .796  | .968  | .972  | .865  | .865  | .864  | .727  | .710  | .750  | .800  | .855  |
| GEH_3     | .815        | .819  | .817  | .856  | .854  | .857  | .851  | .853  | .834  | .826  | .789  | .812  | .980  | .972  | .853  | .851  | .851  | .705  | .690  | .730  | .770  | .823  |
| ILM_1     | .870        | .874  | .881  | .941  | .935  | .939  | .930  | .932  | .926  | .911  | .904  | .894  | .863  | .865  | .994  | .994  | .990  | .801  | .781  | .834  | .880  | .906  |
| ILM_2     | .873        | .877  | .882  | .941  | .935  | .938  | .930  | .931  | .926  | .906  | .903  | .895  | .861  | .865  | .994  | .991  | .991  | .802  | .780  | .826  | .906  | .904  |
| ILM_3     | .867        | .870  | .873  | .936  | .929  | .932  | .927  | .927  | .922  | .903  | .893  | .882  | .862  | .864  | .990  | .991  | .991  | .802  | .785  | .832  | .872  | .897  |
| NCI_1     | .742        | .745  | .741  | .831  | .833  | .832  | .781  | .779  | .772  | .815  | .762  | .748  | .723  | .727  | .801  | .802  | .802  | .901  | .901  | .755  | .821  | .851  |
| NCI_2     | .725        | .725  | .722  | .808  | .808  | .808  | .765  | .763  | .757  | .796  | .729  | .720  | .709  | .710  | .781  | .780  | .785  | .901  | .901  | .792  | .775  | .830  |
| GEX_1     | .757        | .742  | .739  | .814  | .796  | .812  | .842  | .852  | .831  | .785  | .698  | .590  | .731  | .750  | .834  | .826  | .832  | .755  | .792  | .834  | .865  | .865  |
| QGN_1     | .836        | .860  | .842  | .864  | .845  | .869  | .876  | .863  | .858  | .904  | .803  | .834  | .805  | .800  | .880  | .906  | .872  | .821  | .775  | .834  | .902  | .902  |
| TAQ_1     | .847        | .843  | .842  | .905  | .903  | .907  | .887  | .902  | .892  | .908  | .798  | .839  | .840  | .855  | .906  | .904  | .897  | .851  | .830  | .865  | .902  | .902  |

Data represented in **Figure 5B**. The Spearman rank correlations of the log ratios compare the relative position of a gene in the Test Site X rank order against its position in the Test Site Y rank order.

### H. Additional Analyses from MAQC Study

**Table S12. Average Spearman Rank Correlation (*r*) of Log (Sample B/A)**

| Platform on Y Axis | Platform on X Axis |       |       |       |       |       |       |       |       |     |
|--------------------|--------------------|-------|-------|-------|-------|-------|-------|-------|-------|-----|
|                    | ABI                | AFX   | AG1   | EPP   | GEH   | ILM   | NCI   | GEX   | QGN   | TAQ |
| ABI                | 7870               | 6533  | 7356  | 130   | 7852  | 6907  | 8179  | 121   | 119   | 539 |
|                    | 0.984              |       |       |       |       |       |       |       |       |     |
| AFX                |                    | 6977  | 6763  | 119   | 7050  | 6564  | 7232  | 114   | 102   | 464 |
|                    | 0.875              | 0.995 |       |       |       |       |       |       |       |     |
| AG1                |                    |       | 8311  | 137   | 8210  | 7206  | 8534  | 126   | 117   | 558 |
|                    | 0.875              | 0.933 | 0.981 |       |       |       |       |       |       |     |
| EPP                |                    |       |       | 132   | 141   | 126   | 152   | 28    | 45    | 67  |
|                    | 0.845              | 0.844 | 0.881 | 0.966 |       |       |       |       |       |     |
| GEH                |                    |       |       |       | 10216 | 7507  | 10188 | 147   | 148   | 670 |
|                    | 0.826              | 0.866 | 0.853 | 0.800 | 0.973 |       |       |       |       |     |
| ILM                |                    |       |       |       |       | 7596  | 7724  | 119   | 107   | 502 |
|                    | 0.874              | 0.936 | 0.928 | 0.899 | 0.860 | 0.992 |       |       |       |     |
| NCI                |                    |       |       |       |       |       | 11416 | 150   | 174   | 755 |
|                    | 0.733              | 0.820 | 0.770 | 0.762 | 0.711 | 0.792 | 0.901 |       |       |     |
| GEX                |                    |       |       |       |       |       |       | NA    | 17    | 82  |
|                    | 0.746              | 0.807 | 0.842 | 0.691 | 0.737 | 0.831 | 0.773 | NA    |       |     |
| QGN                |                    |       |       |       |       |       |       |       | NA    | 157 |
|                    | 0.846              | 0.859 | 0.865 | 0.847 | 0.792 | 0.886 | 0.798 | 0.834 | NA    |     |
| TAQ                |                    |       |       |       |       |       |       |       |       | NA  |
|                    | 0.844              | 0.905 | 0.894 | 0.848 | 0.839 | 0.902 | 0.841 | 0.865 | 0.902 | NA  |

The table displays summaries of both inter-site reproducibility, when the platform is compared to itself, or between-platform comparability when one platform is compared to a different platform. The platforms are labeled according to the codes presented in Table 1. **Bottom left**) The average over paired sites for the indicated platform pairings of Spearman rank correlation (*r*) for the log (B/A) values between each paired site-platform **Top right**) Italicized numbers highlighted in grey indicate how many genes were detected on average in at least three of the five replicate A and B (both) samples in both paired site-platforms.

**Table S13. Average Slope ( $\beta$ ) of the Fitted Line**

| Platform on Y Axis | Platform on X Axis |      |      |      |      |      |      |      |      |      |
|--------------------|--------------------|------|------|------|------|------|------|------|------|------|
|                    | ABI                | AFX  | AG1  | EPP  | GEH  | ILM  | NCI  | GEX  | QGN  | TAQ  |
| ABI                | 1.00               | 1.13 | 0.92 | 1.23 | 1.24 | 1.16 | 1.55 | 0.76 | 0.88 | 0.76 |
| AFX                | 0.88               | 1.00 | 0.84 | 1.10 | 1.10 | 1.04 | 1.25 | 0.78 | 0.87 | 0.78 |
| AG1                | 1.08               | 1.19 | 1.00 | 1.34 | 1.36 | 1.22 | 1.73 | 0.91 | 1.09 | 0.89 |
| EPP                | 0.82               | 0.91 | 0.75 | 1.00 | 0.97 | 0.94 | 1.14 | 0.65 | 0.79 | 0.56 |
| GEH                | 0.81               | 0.91 | 0.74 | 1.03 | 1.00 | 0.94 | 1.29 | 0.51 | 0.77 | 0.59 |
| ILM                | 0.86               | 0.97 | 0.82 | 1.07 | 1.07 | 1.00 | 1.28 | 0.71 | 0.80 | 0.71 |
| NCI                | 0.65               | 0.81 | 0.59 | 0.89 | 0.79 | 0.79 | 1.02 | 0.46 | 0.49 | 0.41 |
| GEX                | 1.31               | 1.29 | 1.10 | 1.53 | 1.96 | 1.40 | 2.20 | NA   | 1.40 | 1.01 |
| QGN                | 1.14               | 1.15 | 0.92 | 1.27 | 1.30 | 1.25 | 2.08 | 0.72 | NA   | 0.78 |
| TAQ                | 1.32               | 1.29 | 1.13 | 1.79 | 1.69 | 1.41 | 2.44 | 0.99 | 1.29 | NA   |

We fitted orthogonal regression lines of log Ratio (B/A) values between each possible pairing of site-platform (eg, AG1\_1 vs ILM\_3) using only those transcripts detected ( $\geq 3$  replicates) in each site-platform, and averaged the estimates of slope from the regression results for the platform pairings indicated. If the value in a cell is less than 1, then the signal of detected transcripts for the platform indicated in the column (Platform on Y-axis) is generally compressed versus the platform indicated in the row (Platform on X-axis). One can see that almost all microarray platforms are generally compressed relative to the alternative platforms, although there are exceptions.

## I. Apparent Power Analysis

We used a graphical method based on a modification of the two-sided t-test power analysis in an effort to illustrate the effect of the within-group variation caused by differences in inter-site reproducibility and intrinsic platform-dependent factors, such as the effect size between two groups for every probe on the microarray. The tool is useful for quality assessment, but the results should not be confused with previous microarray power analysis methods where all the parameters are designated with the exception of standard deviation [Hwang, D., *et al. Bioinformatics* **18**, 1184-1193, 2002; Page, G.P. *et al. BMC Bioinformatics* **7**, 84, 2006; Seo, J., *et al. Bioinformatics* **22**, 808-814, 2006; Tibshirani, R. *BMC Bioinformatics* **7**, 106, 2006].

Using our modification of the power analysis, apparent power was calculated for two separate group comparisons at each site: sample A replicates vs. sample B replicates as well as sample C replicates vs. sample D replicates. For our analysis, we used the measured average difference between groups (*i.e.*, A vs. B replicates, or C vs. D replicates) and calculated the estimated pooled standard deviation ( $s_{\text{pooled}}$ ) for each gene based on the signal intensities generated for each of the two experimental groups being compared for each site. The results are expressed as the percentage of genes on the y-axis with a calculated power equal to or greater than a given power on the x-axis, shown in the figure below.

For each comparison, the power analyses for all test sites using the same microarray platform are grouped to display the extremes of test site performance. As expected, the comparisons of the A vs. B replicates demonstrated greater average power than the comparisons of the C vs. D replicates, because the titrated samples can show at most a 3-fold change in gene abundance. Cumulatively each platform has similar power across the 12,091 set of common genes, but for each platform there was at least one site that showed a substantial loss of power due to increased technical noise. For example, Applied Biosystems test site 2 had a lower labeling efficiency in sample type A (Tong, W. *et al. Nat Biotechnol* **24**(9), 2006) which impacted its performance in the power analysis relative to the other platforms for the A vs. B comparison. An increase in power was observed at Illumina site 1 compared to sites 2 and 3. This site 1 also consistently had the lowest CV distribution (**Fig. 1**) while not being any more compressed in signal (**Fig. 5a**) than the other two Illumina sites. These relative differences illustrate the importance of a detailed review of laboratory performance in microarray facilities.

**Apparent Power Analysis Methods.** The power analysis is based on data from the 12,091 common genes set. No filtering related to gene detection was performed. Three probes were removed from the analysis because data were missing in three or more of the groups. Microarray data were normalized using the manufacturer's suggested method and  $\log_2$  transformed. After  $\log_2$  transformation, the signal for all microarrays approximated a normal distribution (data not shown). We implemented a novel power analysis based on Warnes & Liu's method ([www.bioconductor.org/repository/devel/vignette/ssize.pdf](http://www.bioconductor.org/repository/devel/vignette/ssize.pdf)) with four key modifications: 1) the average difference between groups was explicitly calculated for each probe; 2) a pooled estimate of  $\sigma$  ( $s_{\text{pooled}}$ ) was used; 3) experimentally derived power was plotted; and 4) the method was generalized so it could be used for all microarray platforms. The key component of this analysis is the generation of a cumulative plot of the proportion of genes achieving a desired power for a given sample size ( $n = 5$ ), multiple test corrected  $\alpha$  ( $0.05/n$ ) using the Bonferonni method, and a probe-by-probe  $s_{\text{pooled}}$  for each site and measure difference between groups at each site.

**Table S14. Number of Genes with Power  $\geq 0.8$** 

| Microarray Platform | A vs. B Comparison |        |        | C vs. D Comparison |        |        |
|---------------------|--------------------|--------|--------|--------------------|--------|--------|
|                     | Site 1             | Site 2 | Site 3 | Site 1             | Site 2 | Site 3 |
| Applied Biosystems  | 3782               | 1916   | 3261   | 1560               | 1031   | 666    |
| Affymetrix          | 5821               | 5710   | 5959   | 2448               | 2731   | 1931   |
| Agilent (one color) | 3733               | 4184   | 4239   | 1535               | 531    | 1578   |
| GE Healthcare       | 3044               | 4192   | 3934   | 455                | 1521   | 1553   |
| Illumina            | 5367               | 4339   | 3331   | 2593               | 1656   | 1359   |

**Figure S1. Apparent Power Analysis.**

The power analysis used the standard formula for the power of two-group t-test with pooled  $\sigma$ . The mean difference between groups of sample type A replicates vs. sample type B replicates (**top**) as well as sample type C replicates vs. sample type D replicates (**bottom**) were computed for each gene and the  $\sigma$  at each location was calculated independently and plotted by location. The x-axis is the calculated power and the y-axis is the percent of genes that have that power or greater. The number of genes with power  $\geq 0.8$  for each test site is reported in Supplemental **Table S14**. Only genes from the 12,091 common set were included in the analysis. Results for each platform are displayed in separate plots per comparison. The power lines for each test site are colored as indicated. As described in the text, data from some platforms were omitted from these calculations due to quality issues. The platforms and sample types are labeled according to the nomenclature presented in **Table 1**.

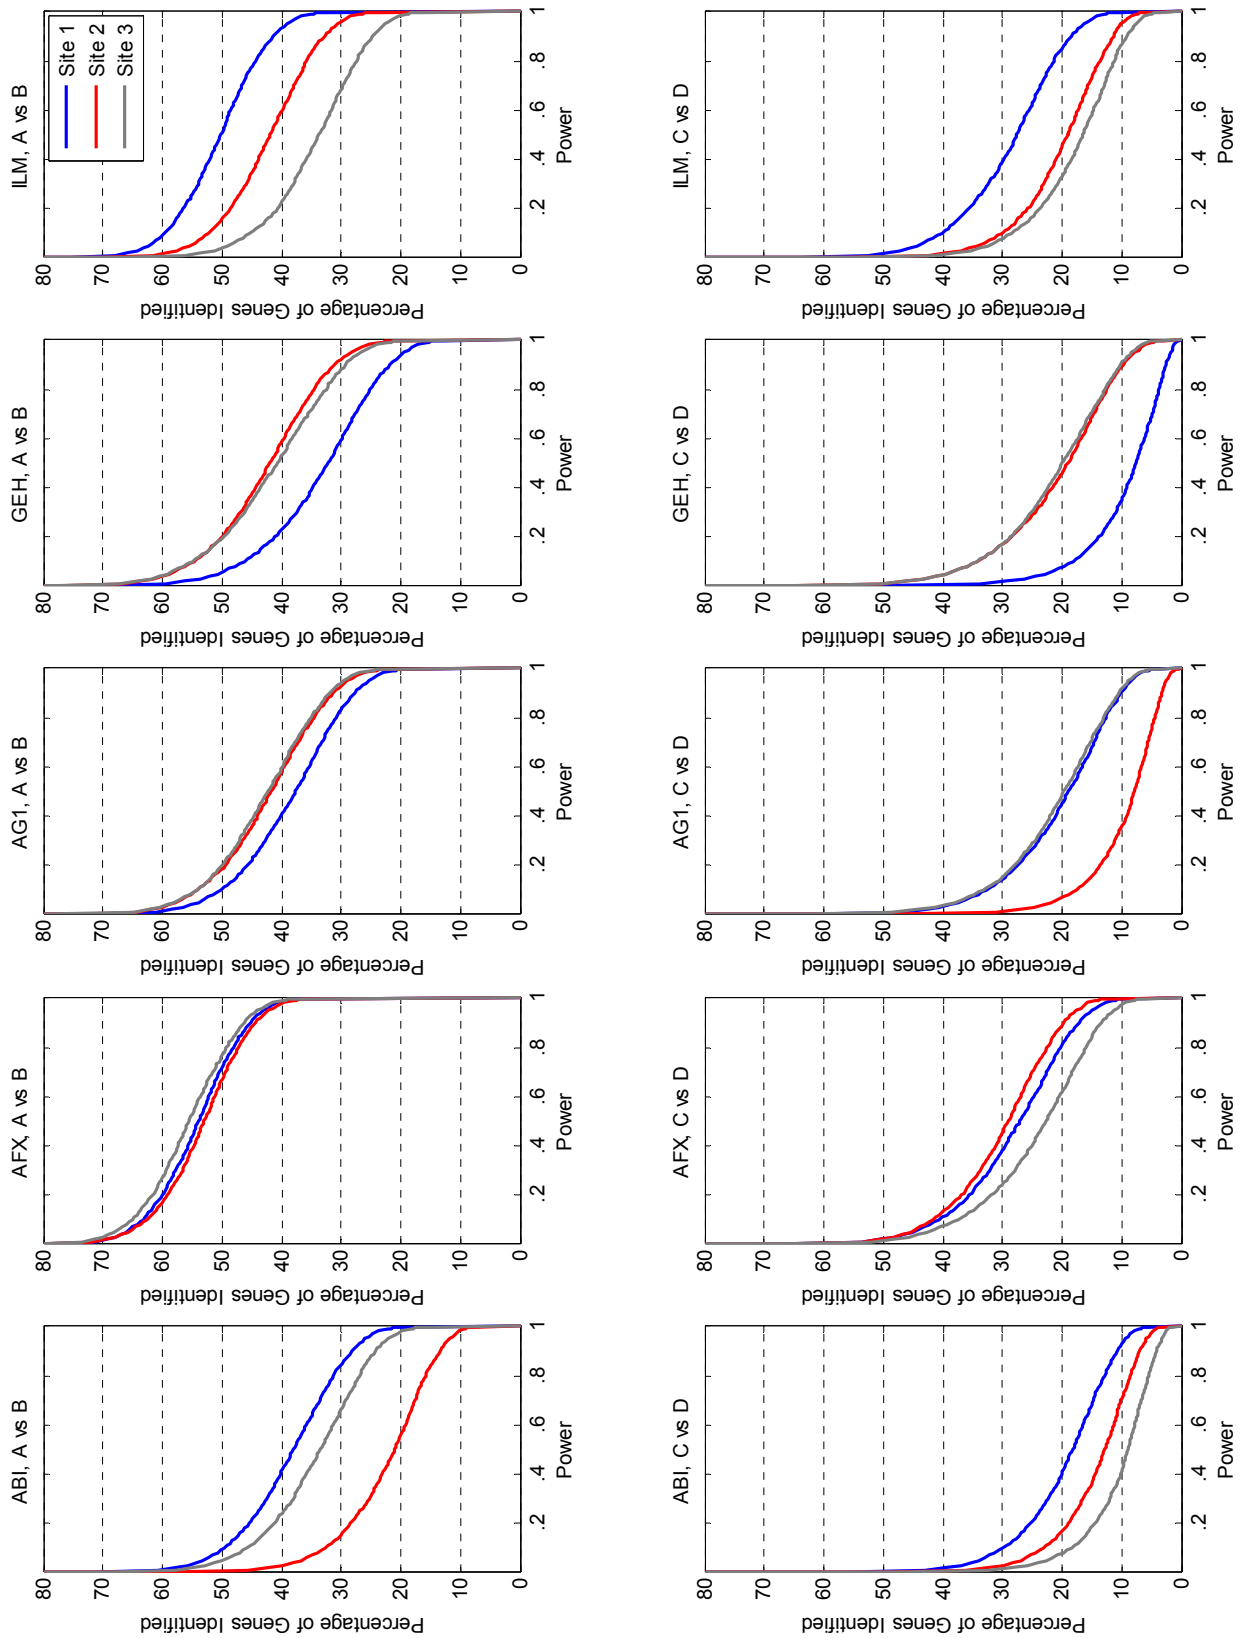

## J. Reproducibility of Lists of Differentially Expressed Genes – POG Results

**Gene Ranking (Selection) Rules:** Six gene ranking (selection) methods were examined: (1) Fold-change ranking; (2) Fold-change with *P* cutoff of 0.05; (3) Fold-change ranking with *P* cutoff of 0.01; (4) *P* ranking; (5) *P* ranking with fold-change cutoff of 2.0; (6) *P* ranking with fold-change cutoff of 1.4. When a cutoff value (*e.g.*,  $P < 0.05$ ) is imposed with a particular ranking metric (*e.g.*, fold-change), frequently the lists of candidate genes that meet the cutoff value will not be the same for the two test sites as a result of differences in inter-site variations. Such differences are part of the gene selection process and have been carried over to the gene ranking/selection stage. *P* values are derived from simple t-tests using log<sub>2</sub> intensity data assuming equal variance.

**POG (Percentage of Overlapping Genes):** The POG (percentage of overlapping genes) is a measure of the reproducibility of lists of differentially expressed genes (Shi, L. *et al.* Cross-platform comparability of microarray technology: intra-platform consistency and appropriate data analysis procedures are essential. *BMC Bioinformatics* **6**(Suppl 2), S12, 2005). The POG graph (**Fig. S2**) can be viewed as a combination of many Venn diagrams based on various thresholds of fold-change and/or *P* which are arbitrary. The number of genes considered as differentially expressed is denoted as 2L, where L is both the number of genes up- and down-regulated. The number of genes available for ranking and selection in one direction, L, varies from 1 to 6000 (with a step of one) or when there are no more genes in one regulation direction, corresponding to 2L varying from 2 to 12,000. Directionality of gene regulation is considered in POG calculations; genes selected by two test sites but with different regulation directionalities are considered as discordant. The formula for calculating POG is:

$$\text{POG} = 100 * (\text{DD} + \text{UU}) / 2L$$

where DD and UU are the number of commonly down- or up-regulated genes, respectively, from the two lists, and L is the number of genes selected from the up- or down-regulation directionality. To overcome the confusion of different numbers for the denominator, in our POG calculations we deliberately selected an equal number of up-regulated and down-regulated genes, L.

**Figure S2** shows that the reproducibility of differentially expressed genes is dramatically impacted by several factors: gene ranking/selection methods, the inherent differences between the samples being compared, and the choice of thresholds (corresponding to the number of genes selected as differentially expressed). Given the same data set, the reproducibility of microarray results can be dramatically impacted by the choice of different gene selection methods. Data from Affymetrix's test sites were used to create **Figure S2**, but similar results have been observed in inter-site comparisons of data from other platforms or in cross-platform comparisons. Furthermore, similar results were obtained when a rat toxicogenomics data set was analyzed (Guo, L. *et al.* *Nat. Biotechnol.* **24**(9), 2006).



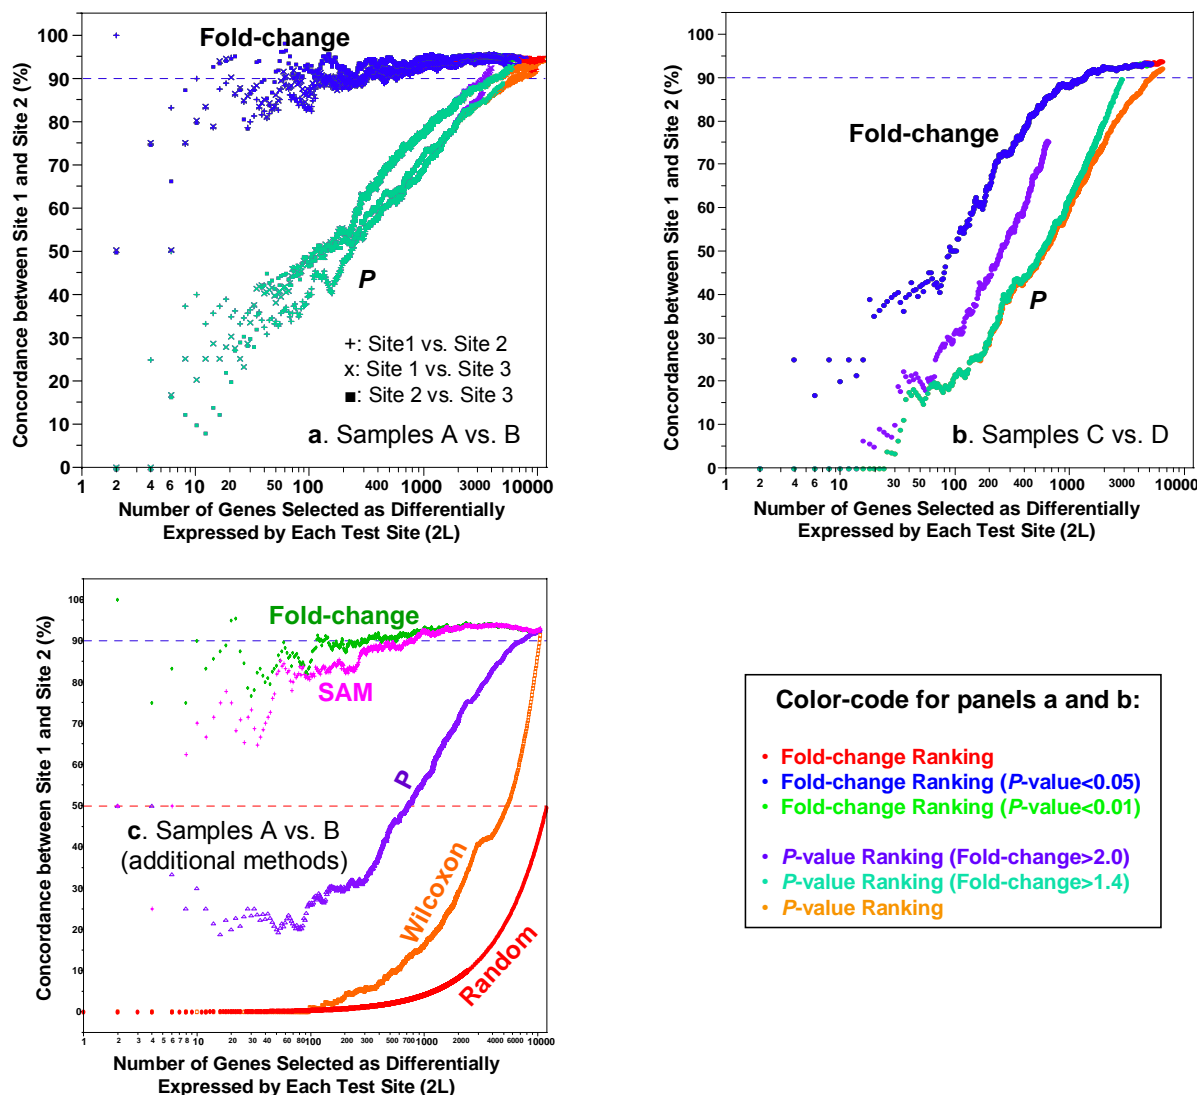

**Figure S2. Reproducibility of lists of differentially expressed genes – POG results.** (a) Sample A versus Sample B (Site 1 vs. Site 2, Site 1 vs. Site 3, and Site 2 vs. Site 3); (b) Sample C versus Sample D (Site 1 vs. Site 2); and (c) Sample C versus Sample D with additional methods compared (Site 1 vs. Site 2). Each panel represents the concordance results (POG) for comparing Affymetrix’s test sites. The x-axis represents the number of genes selected as differentially expressed (corresponding to different thresholds), and the y-axis is the percentage (%) of genes common to the two gene lists derived from two test sites at a given number of selected genes. For the Wilcoxon rank-sum tests (panel c), there were many ties, *i.e.*, many genes exhibited the same level of statistical significance because of the small sample sizes (five replicates for each group). The tied genes from each test site were broken (ranked) by random ordering. Concordance between genes selected completely at random is shown in red and reaches only 50% when all candidate genes are declared as differentially expressed due to directionality disagreement. The POG results by SAM (pink line), although greatly improved over that of simple t-test statistic (purple line), approached, but did not exceed, the level of POG based on fold-change ranking (green line).
